# Supplementary material for: Regulation of Notch signaling by the chromatin-modeling protein Hat-trick
Source: Oxford University Press journal article supplement (doi:10.1242/dev.170837), 2019-05-29
Supplement: dev170837supp.pdf [file dev170837supp.pdf]

A

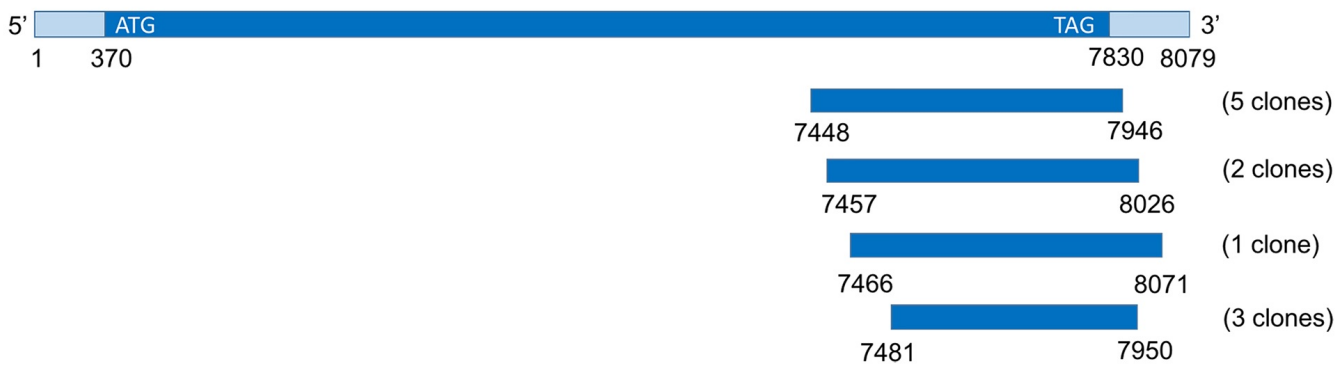

B

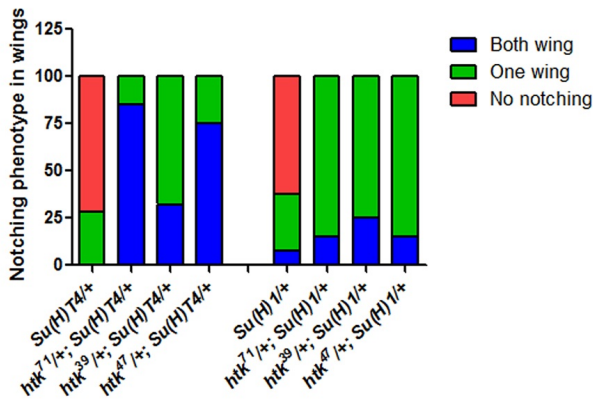

C

| Genotype                                  | Phenotypes (%)                                                                                                                                                                                                                                                                                                                                                            |
|-------------------------------------------|---------------------------------------------------------------------------------------------------------------------------------------------------------------------------------------------------------------------------------------------------------------------------------------------------------------------------------------------------------------------------|
| <i>+/+; ap-GAL4/+; UAS-htk-RNAi/+</i>     | Extra vein material near 2 <sup>nd</sup> Cross Vein : 46%<br>Defect in 2 <sup>nd</sup> cross vein : 60%<br>Extra row of bristles near wing margin : 34%<br>1 <sup>st</sup> vein defective : 100%<br>Patch of disorganized tissue at the tip of the vein : 60%<br>Blisters in wing : 14%<br>wings directed outward and upward : 100%<br>Increased scutellar bristles : 72% |
| <i>+/+; MS1096-GAL4/+; UAS-htk-RNAi/+</i> | Extra row of bristles near wing margin : 89%<br>Patch of disorganized tissue at the tip of the vein : 72%<br>Defect in 1 <sup>st</sup> cross vein : 52%                                                                                                                                                                                                                   |
| <i>+/+; +/+; C96-GAL4 /UAS-htk-RNAi</i>   | Defect in 1 <sup>st</sup> cross vein : 44%<br>Extra vein : 12%<br>Unusual bristle pattern : 39%<br>Patch of disorganized tissue at the tip of the vein : 39%                                                                                                                                                                                                              |
| <i>+/+; ptc-GAL4 /+; UAS-htk-RNAi/+</i>   | Defect in 1 <sup>st</sup> cross vein : 75%<br>Patch of disorganized tissue at the tip of the vein : 52.5%<br>Extra vein material near cross vein : 13%<br>1 <sup>st</sup> cross vein very short and reduced intervein distance between L3-L4 : 100%                                                                                                                       |
| <i>+/+; +/+; dpp-Gal4/UAS-htk-RNAi</i>    | Extra vein material near 2 <sup>nd</sup> cross vein : 7.14%<br>Patch of disorganized tissue at the tip of the vein : 49%<br>Double 1 <sup>st</sup> cross vein : 4%                                                                                                                                                                                                        |
| <i>+/+; en-GAL4/+; UAS-htk-RNAi</i>       | mis-oriented bristles and thinner wing blade in posterior region of wings : 75%                                                                                                                                                                                                                                                                                           |
| <i>+/+; ey-GAL4/+; UAS-htk-RNAi</i>       | Reduced eye size : 100%                                                                                                                                                                                                                                                                                                                                                   |

D

| Genotype                             | Phenotypes (100%)                                                                     |
|--------------------------------------|---------------------------------------------------------------------------------------|
| <i>+/+; ap-GAL4/+; UAS-HA-htk/+</i>  | • loss of scutellar bristles<br>• reduced size of scutellum<br>• severe wing blisters |
| <i>+/+; en-GAL4 /+; UAS-HA-htk/+</i> | • bending of third wing vein<br>• thinner wing blade<br>• incomplete fifth vein       |
| <i>+/+; ey-GAL4 /+; UAS-HA-htk/+</i> | • loss of ommatidia                                                                   |
| <i>+/+; +/+; GMR-Gal4/UAS-HA-htk</i> | • eye roughening                                                                      |

**Figure S1:** (A) Schematic representation of the sequence range of 11 positive yeast two-hybrid clones which overlapped with *htk* cDNA, when amino terminus of Notch-ICD (amino acids 1765–1895) was used as bait to screen  $6 \times 10^6$  cDNAs from a *Drosophila* 0–24 h embryonic library. (B) Graph showing the frequency (number) of wing notching phenotypes observed in *Su(H)T4* and *Su(H)1* alleles individually and in trans-heterozygous combination with different *htk* alleles: *htk*<sup>71</sup>, *htk*<sup>39</sup>, *htk*<sup>47</sup>. (C) Development defects induced by down-regulation of *htk* with a variety of GAL4 drivers, n=200. (D) Defects observed in wing and eye when ectopic expression of HA-*htk* was induced with a variety of GAL4 drivers, n=200. All phenotypes examined were 100% penetrant.

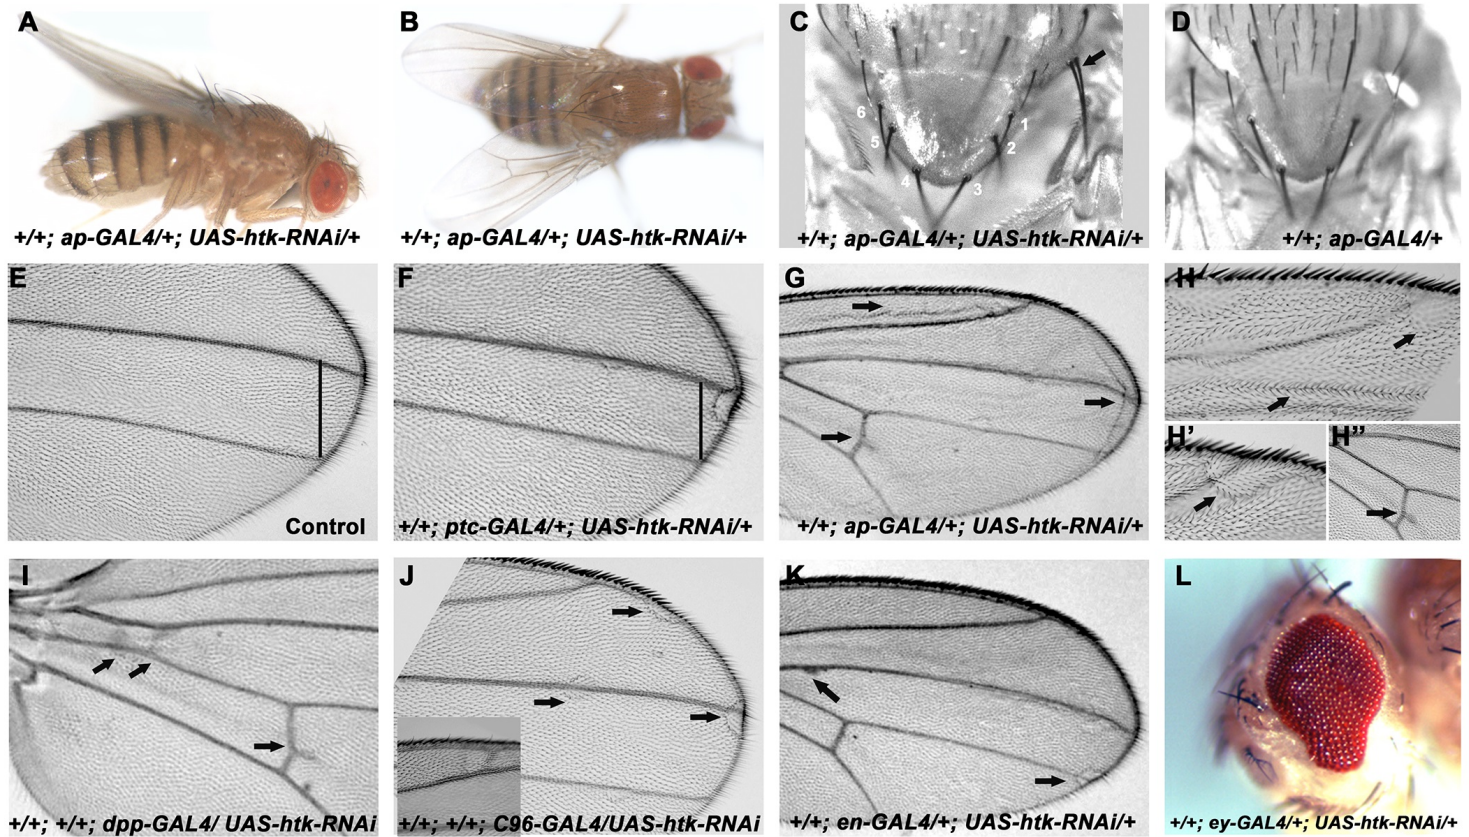

**Figure S2: Down-regulation of *htk* exhibits distinct phenotypes in *Drosophila* wings and eyes.** (A-D, G) *apterous-GAL4* driven *htk-RNAi* displayed upward (A) and outward (B) directed wings with extra rows of sensory bristles and vein material (arrow) in the wingblade (G), and increased scutellar bristles (C) compared to control (D). Similarly when *htk* was down-regulated at anterior-posterior boundary using *patched-GAL4* (F) and *dpp-GAL4* (I), at wing margin using *C96-GAL4* (J), in posterior compartment of wing using *engrailed-GAL4* (K), and in the eye using *eyeless-GAL4* (L), it resulted in reduced distance between L3 and L4 veins (black line) (F), extra vein material (arrows) (I), areas with thinner cuticle (arrows) (J, K) and reduced eye-size (L), respectively. (E) Control adult wing displaying normal wing margin and longitudinal veins L1–L5. (H–H'') High magnification images of wing showing extra row of bristles (H), area with thinner cuticle (H'), and extra vein material (H''). Several *htk* down-regulation phenotypes mimic Notch loss-of-function phenotypes.



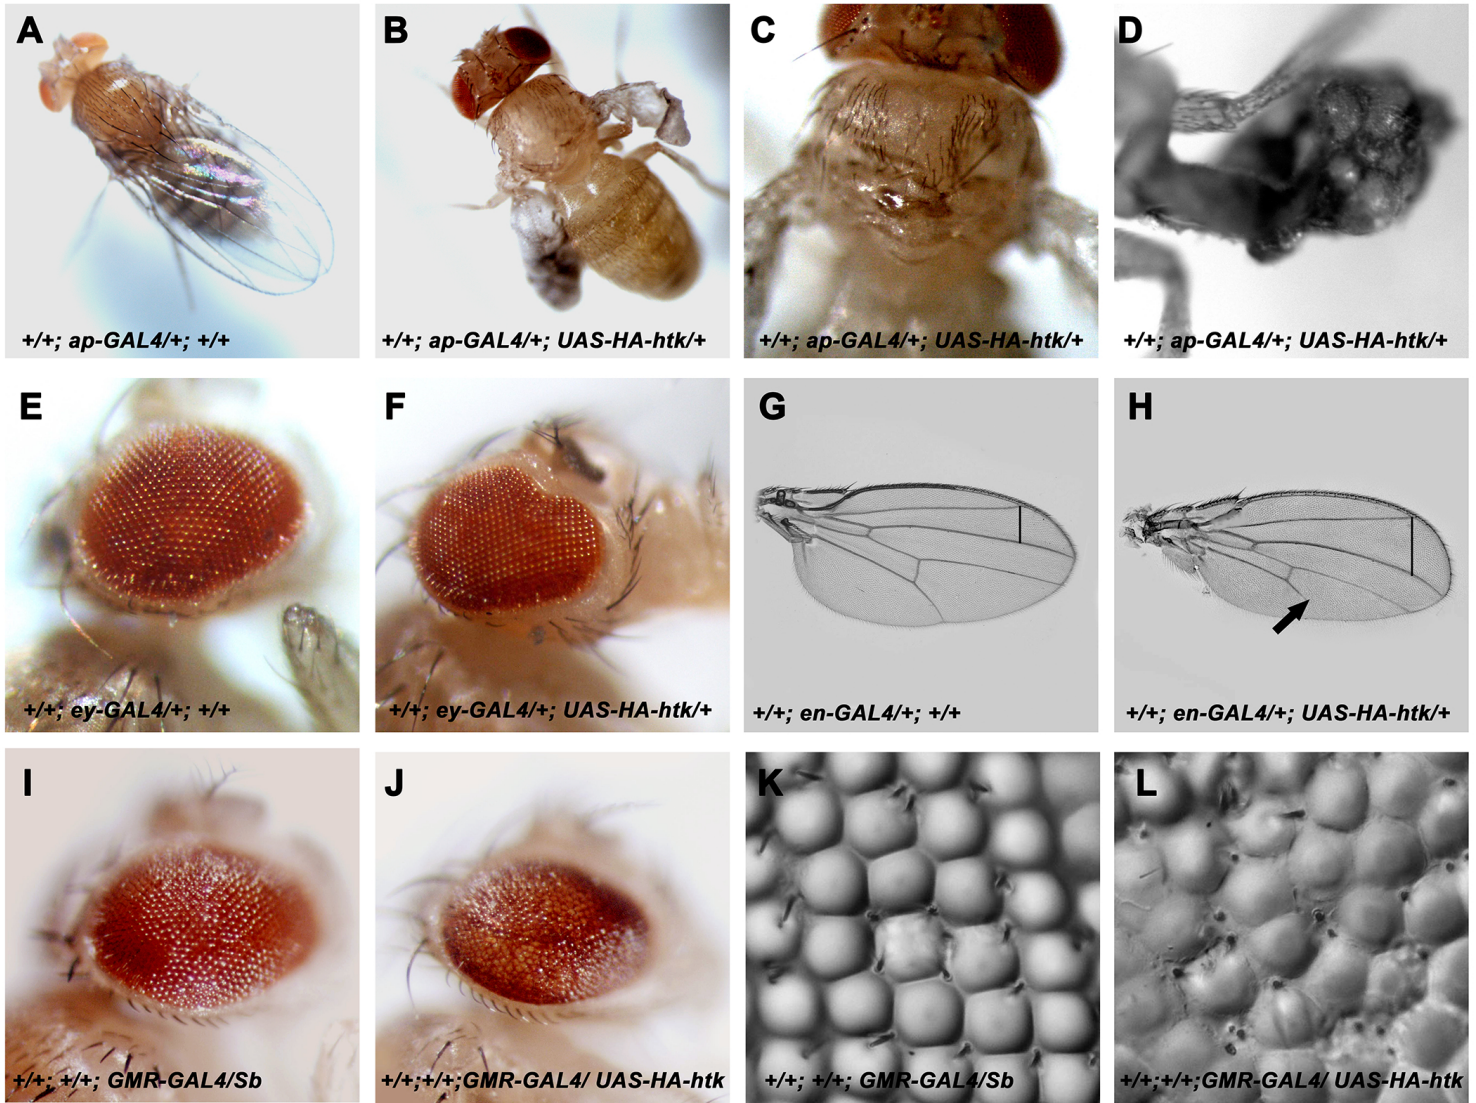

**Figure S3: Over-expression of *htk* resembles *Notch* gain-of-function phenotypes.** (A-D) Ectopic expression of *htk* driven by *apterous-GAL4* causes loss of scutellar bristles (B, C) and deformed wing (B, D) in comparison to only *apterous-Gal4/+* fly (A). (E,F) *eyeless-GAL4* driven expression of *htk* in eye results in loss of ommatidia. (G,H) Over-expression of *htk* in posterior region of wing using *engrailed-GAL4* results in incomplete fifth vein and increased inter-vein distance between second and third vein. (I, J) Ectopic expression in adult eye using *GMR-GAL4* results in increased eye-roughening and loss of ommatidial bristles. (K, L) Nail polish imprint images of adult eye showing these eye phenotypes more clearly. Phenotypes showed 100% penetrance.



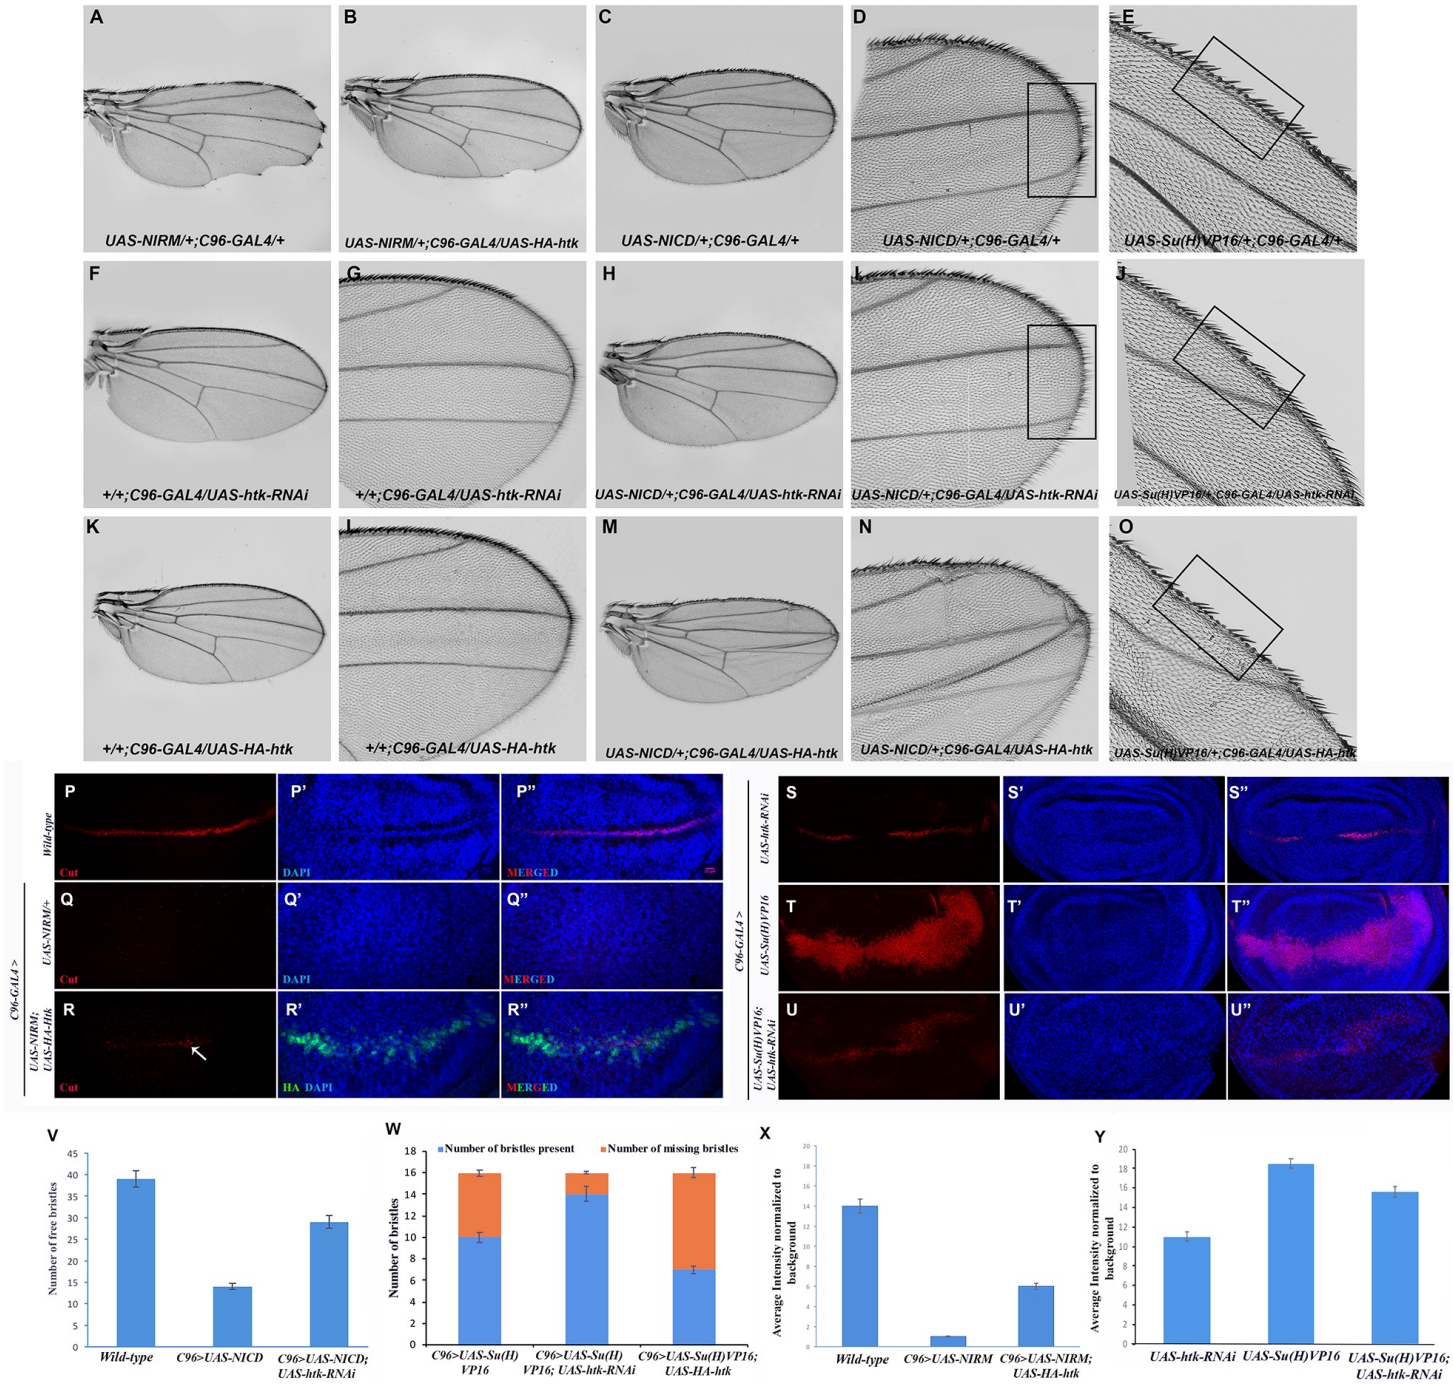



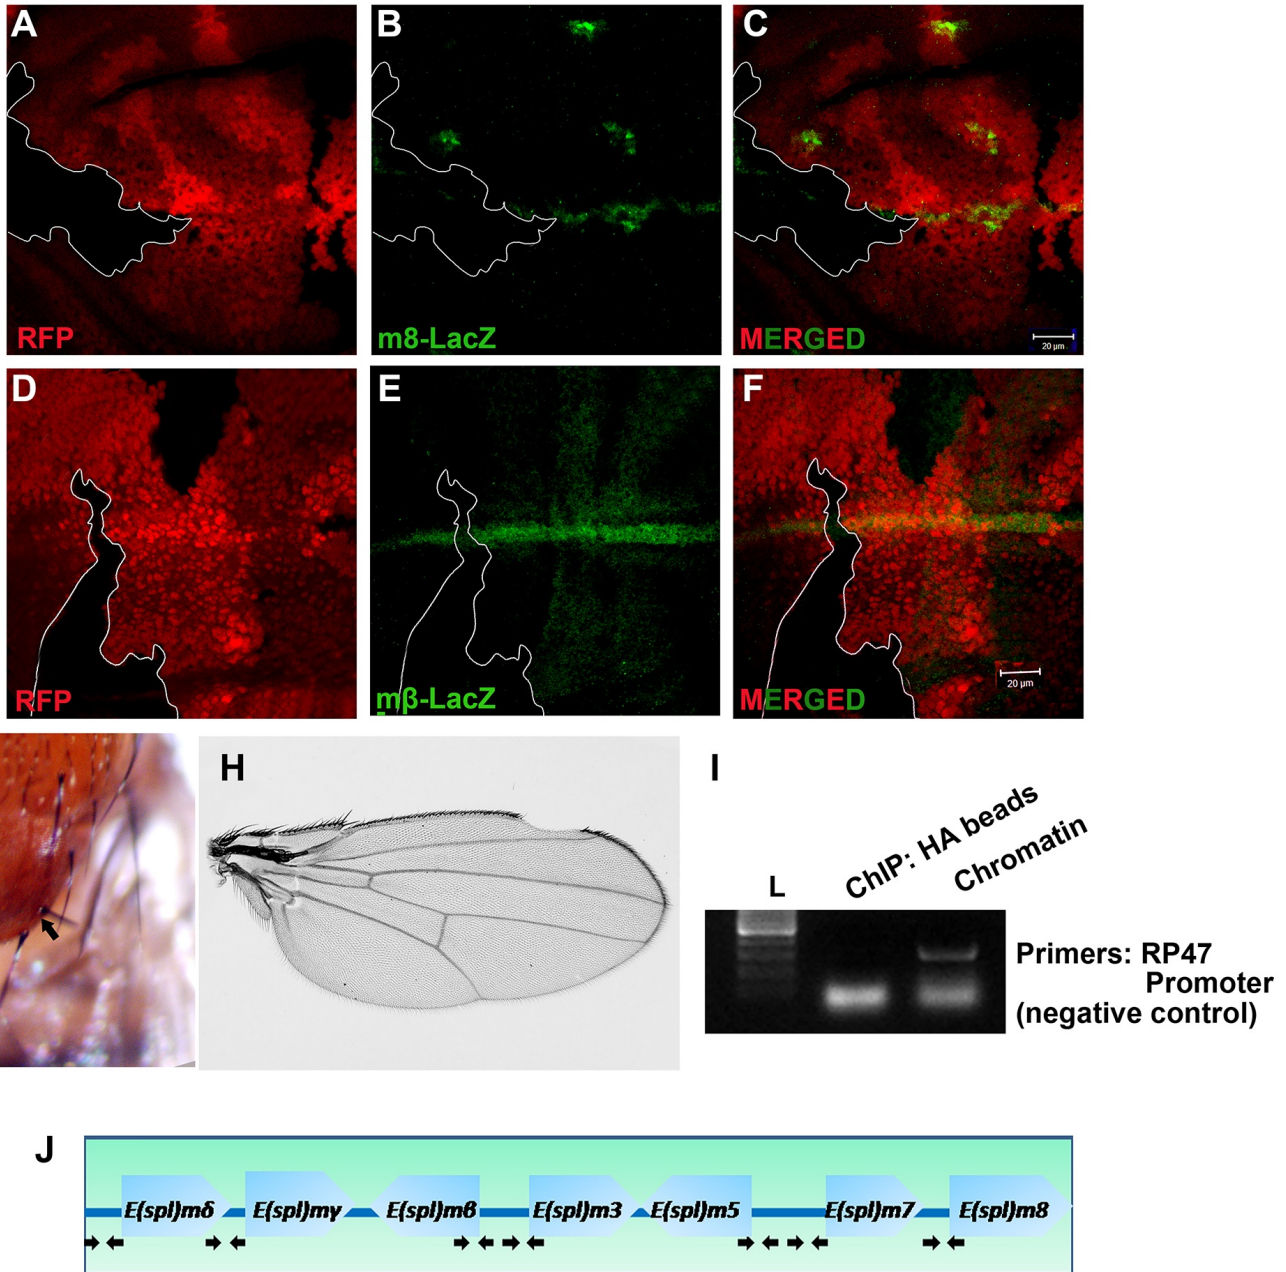

**Figure S5: *htk* regulates Notch signaling activity.** (A-F) Loss-of-function clones of *htk* displayed reduced expression of *E(spl)* complex genes. (A, D) *htk* mutant somatic clones were marked by absence of RFP expression. (B, E) The LacZ reporter stocks were used to verify *E(spl)m8* and *E(spl)mβ* expression (shown in green). Third column images are merges of those in first and second columns. The expression of Notch downstream targets, *E(spl)m8* (A-C) and *E(spl)mβ* (D-F) was significantly reduced in *htk* loss-of-function clones. Scale bar, 20 μm. (G-H) Adults developed from larvae containing *htk* loss-of-function somatic clones, displayed various developmental defects such as increased scutellar bristles (arrow, G), notching at wing margin (H), etc. These phenotypes are also Notch loss-of-function phenotypes. I. Agarose gel electrophoresis image for negative control showing that Htk could not immunoprecipitate promoter of *RPS 49* gene. PCR using primers specific for promoter of *RPS 49* gene shows no positive amplification from template DNA fragments which was immunoprecipitated with Htk protein (Lane 2). Chromatin samples before immunoprecipitation contain all the genomic DNA fragments, and were used for positive control (Lane 3). J. Schematic picture representing the localization of the primers used for ChIP experiment.

**Table S1. Primers for RT-qPCR**

|                                              |
|----------------------------------------------|
| m $\beta$ _RT_Fw 5'- ACCGCAAGGTGATGAAGC -3'  |
| m $\beta$ _RT_Re 5'- CTTCATGTGCTCCACGGTC -3' |
| m $\delta$ _RT_Fw 5'- ATGGCCGTTCAGGGTCAG -3' |
| m $\delta$ _RT_Re 5'- CCATGGTGTCCACGATG -3'  |
| m $\gamma$ _RT_Fw 5'- GTCCGAGATGTCCAAGAC -3' |
| m $\gamma$ _RT_Re 5'- GACTCCAAGGTGGCAACC -3' |
| m3_RT_Fw 5'- ATGGTCATGGAGATGTCC -3'          |
| m3_RT_Re 5'- GCACTCCACCATCAGATC -3'          |
| m5_RT_Fw 5'- ATGGCACCACAGAGCAAC-3'           |
| m5_RT_Re 5'-TGTCCATTTCGCAGGATGG -3'          |
| m7_RT_Fw 5'- GGCCACCAAATACGAGATG -3'         |
| m7_RT_Re 5'- CAT CGC CAG TCT GAG CAA -3'     |
| m8_RT_Fw 5'- GGAATACACCACCAAGACC -3'         |
| m8_RT_Re 5'- CGCTGACTCGAGCATCTC -3'          |

**Table S2. Primers for promoter regions**

|                                            |
|--------------------------------------------|
| m3_Fw 5'-GATCCAATCCGAAAGCCG-3'             |
| m3_Re 5'-CTAGTCCCAGCCCTACT-3'              |
| m5_Fw 5'-GTGGTTGTCTGTGTGGAG-3'             |
| m5_Re 5'-GACCTGCTACCTGCGAACA-3'            |
| m7_Fw 5'-GCACGCATGTTCCGTTTG-3'             |
| m7_Re 5'-GGGAAACACTTTGCCCTC-3'             |
| m8_Fw 5'-GCCAATATGCCACATCCAC-3'            |
| m8_Re 5'-GGAACAGCTGCAACTTCG-3'             |
| m $\beta$ _Fw 5'-ACTTCGATCGGTTCCCAG-3'     |
| m $\beta$ _Re 5'-GAACTGGACAGTGAGTGC-3'     |
| m $\delta$ _Fw 5'-GCGGCACAATCCCAATAC-3'    |
| m $\delta$ _Re 5'-CTGGTCCCCTTCCCT-3'       |
| m $\gamma$ _Fw 5'-CACTCCGTTTACAAATCCCTG-3' |
| m $\gamma$ _Re 5'-GCTAGACCTTCGGTGATC-3'    |
